# Supplementary material for: A NbO-type mixed lanthanide metal–organic framework for cryogenic temperature sensing
Source: Royal Society of Chemistry journal article supplement (doi:10.1039/d4cc04715j), 2024-11-25
Supplement: d4cc04715j1.pdf [file d4cc04715j1.pdf]

## Supplementary information

# A NbO-type mixed lanthanide metal-organic framework for cryogenic temperature sensing

Yi Li,<sup>a</sup> Xiaoman Zhang,<sup>b</sup> Huizhen Wang,<sup>c</sup> Lin Zhang,<sup>b\*</sup> Hongjun Li<sup>a\*</sup> and  
Dian Zhao<sup>b\*</sup>

<sup>a</sup> Department of Physics, Zhejiang Normal University, Jinhua 321004, China.

<sup>b</sup> Key Laboratory of the Ministry of Education for Advanced Catalysis Materials, College of Chemistry and Materials Science, Zhejiang Normal University, Jinhua 321004, China.

<sup>c</sup> State Key Laboratory of Silicon and Advanced Semiconductor Materials, School of Materials Science and Engineering, Zhejiang University, Hangzhou 310027, China.

Corresponding Author:

linzhang@zjnu.edu.cn (Lin Zhang); hongjunli@zjnu.edu.cn (Hongjun Li); dzhao@zjnu.edu.cn (Dian Zhao).

## Experimental Section

### 1. Materials and characterization

The ligand H<sub>4</sub>PDDI was synthesized according to the previous literature.<sup>1</sup> All other relevant chemicals and solvents were obtained from commercial sources and used without further purification. Powder X-ray diffraction (XRD) patterns were acquired on a Maxima\_X XRD-7000 diffractometer with Cu K<sub>α</sub> ( $\lambda = 1.542 \text{ \AA}$ ) radiation and gathered within  $2\theta$  range of 3 to 50° with a rate of 5°/min under room temperature. Thermogravimetric analyses (TGA) were obtained in the temperature range of 303-1073 K by a Netzsch TG209F3 analyzer under nitrogen atmosphere with a heating rate of 5 K min<sup>-1</sup>. Fourier transform infrared (FTIR) spectra was recorded on a Thermo Fisher Nicolet iS10 spectrophotometer with KBr pellet technique and collected at range from 4000 to 400 cm<sup>-1</sup>. The pellets were manufactured by mixing and grinding KBr with the sample thoroughly. Then, the mixture was compressed under the pressure to obtain a transparent pellet. Eu<sub>0.26</sub>Tb<sub>0.74</sub>PDDI crystalline powders were dissolved in nitric acid aqueous solution and sonicated until clarification. The solution was tested by inductively coupled plasma optical emission spectra (ICP-OES), which was recorded on an Agilent ICP-OES720ES system to determine the molar ratios of Eu<sup>3+</sup> and Tb<sup>3+</sup> in this mixed lanthanide MOFs. N<sub>2</sub> adsorption data were collected by using a fully automated gas adsorption meter (Micromeritics ASAP 2020HD88) via a liquid N<sub>2</sub> bath and a circulating thermostatic water bath (Julabo F12) under 77 K. Before the test, MOF samples were solvent exchanged with ethanol and activated by vacuum drying at 373 K for 10 h. The temperature-dependent luminescence spectra and decay curves of the MOF samples were recorded by an Edinburgh Instrument F920 spectrometer with a He closed-cycle cryostat system with a Lakeshore 331 temperature controller, and the slits for the excitation and emission are fixed at 1 nm.

The molecular geometry optimization and frequency analysis of H<sub>4</sub>PDDI were performed using density functional theory (DFT) at the B3LYP/6-31+G(d,p) level (Fig. S6)<sup>2</sup>. Based on the optimized result, the energy of the lowest triplet excited state of the H<sub>4</sub>PDDI were calculated to be 2.851 eV (22995 cm<sup>-1</sup>) by the time-dependent DFT approach<sup>3</sup>. All calculations were performed using Gaussian 09 software<sup>4</sup>.

The single-crystal XRD data of TbPDDI were measured on a Bruker Smart Apex II diffractometer with Mo K<sub>α</sub> ( $\lambda = 0.71073 \text{ \AA}$ ) radiation. The crystal structure data of TbPDDI was collected by SHELX-2013 program package on the strength of the full-matrix least-squares on  $F^2$  method. Crystallographic data of TbPDDI was listed in Table S1. The morphology and size of as-prepared crystals were observed by virtue of Olympus IX73 inverted microscope.

### 2. Synthesis of LnPDDI (Ln = Eu, Tb, Tb<sub>1-x</sub>Eu<sub>x</sub>)

Take TbPDDI as an example, H<sub>4</sub>PDDI (20.0 mg, 0.0491 mmol) and Tb(NO<sub>3</sub>)<sub>3</sub>·6H<sub>2</sub>O (133 mg, 0.294 mmol) were dissolved into a mixed solvent of N,N-dimethylformamide (DMF, 4 mL), methylbenzene (8 mL), deionized water (100  $\mu$ L) in a screw-capped glass vial (25 mL), and then nitric acid (3.5 M, 50  $\mu$ L) were added, sealed and placed in an oven at 358 K for 12 h. After cooling to room temperature naturally, transparent rhombus crystals were acquired, collected by filtration and washed with DMF several times. Yield: 71%. Additionally, the synthesis of EuPDDI and Tb<sub>1-x</sub>Eu<sub>x</sub>PDDI were similar to TbPDDI except for replacing the Tb(NO<sub>3</sub>)<sub>3</sub>·6H<sub>2</sub>O with Eu(NO<sub>3</sub>)<sub>3</sub>·6H<sub>2</sub>O and the mixture of Tb(NO<sub>3</sub>)<sub>3</sub>·6H<sub>2</sub>O and Eu(NO<sub>3</sub>)<sub>3</sub>·6H<sub>2</sub>O as the initial reactants,

respectively. The as-synthesized microcrystals were placed in an 353 K oven for 6 hours to ensure complete drying, and the dried samples were the used for further measurements.

### 3. Tables and figures

**Table S1.** Crystallographic Data collection and Refinement result for TbPDDI.

| TbPDDI                                               |                                      |
|------------------------------------------------------|--------------------------------------|
| Chemical formula                                     | $C_{222}H_{298}N_{43}O_{110}Tb_{12}$ |
| Formula weight                                       | 7236.169                             |
| Temperature (K)                                      | 247.15                               |
| Wavelength (Å)                                       | 0.71073                              |
| Crystal system                                       | Trigonal                             |
| Space group                                          | $P3_221$                             |
| $a$ (Å)                                              | 19.9247(18)                          |
| $b$ (Å)                                              | 19.9247(18)                          |
| $c$ (Å)                                              | 68.595(9)                            |
| $\alpha$ (°)                                         | 90                                   |
| $\beta$ (°)                                          | 90                                   |
| $\gamma$ (°)                                         | 120                                  |
| $V$ (Å <sup>3</sup> )                                | 23583(5)                             |
| $Z$                                                  | 3                                    |
| Density (calculated g/cm <sup>-3</sup> )             | 1.529                                |
| Absorbance coefficient (mm <sup>-1</sup> )           | 2.747                                |
| $F(000)$                                             | 10782.0                              |
| R(int)                                               | 0.0522                               |
| Goodness of fit on $F^2$                             | 1.029                                |
| $R_1, wR_2$ ( $I > 2\sigma(I)$ )                     | 0.0544, 0.1424                       |
| $R_1, wR_2$ (all data)                               | 0.0576, 0.1448                       |
| Largest difference peak and hole (e/Å <sup>3</sup> ) | 1.68, -2.33                          |
| CCDC 2205669                                         |                                      |

**Table S2.** The molar ratio of the starting Tb/Eu salt and that in the synthesized product calculated by ICP-OES analysis.

| sample                                        | The molar ratio of the starting Tb/Eu salt | The Tb/Eu ratio calculated by ICP analysis |
|-----------------------------------------------|--------------------------------------------|--------------------------------------------|
| <b>NbO-Tb<sub>0.74</sub>Eu<sub>0.26</sub></b> | 0.75:0.25                                  | 0.74:0.26                                  |

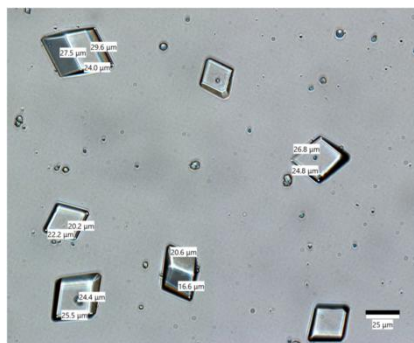

**Fig. S1** The optical images of TbPDDI crystals.

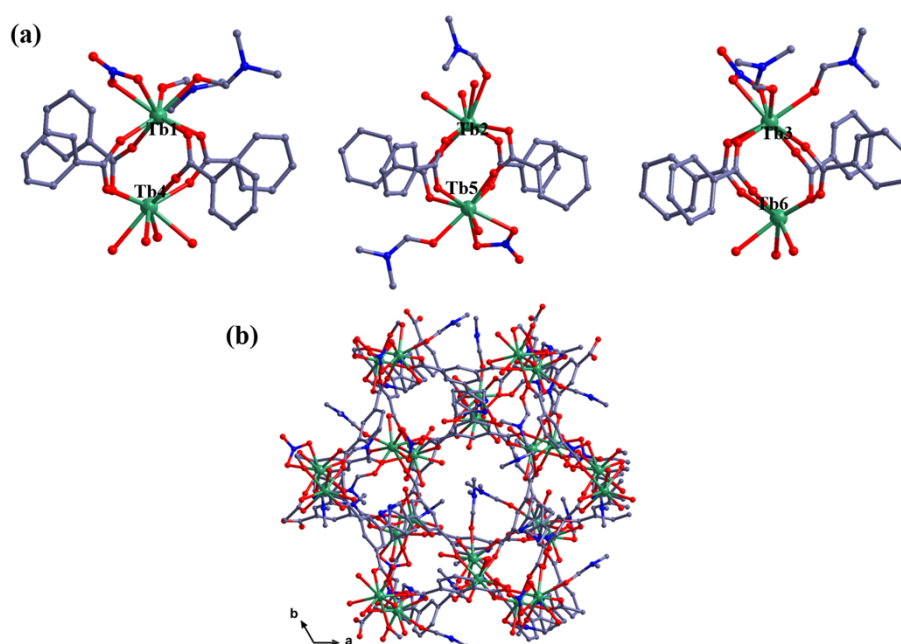

**Fig. S2** (a) The three different  $Tb_2(COO)_4$  SBUs with the Tb1-Tb4, Tb2-Tb5, and Tb3-Tb6 separations. (b) The structure of TbPDDI with the coordinated solvent molecules and ions in the pores.

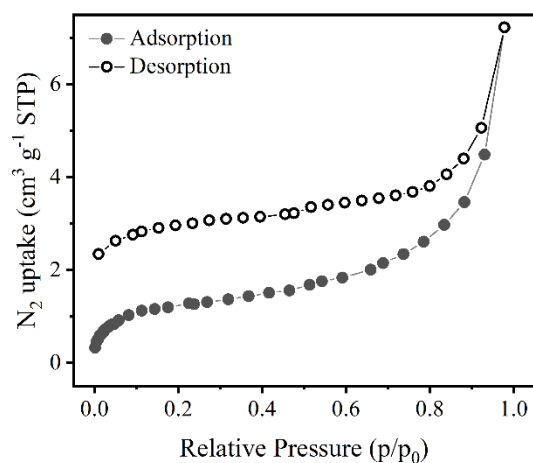

**Fig. S3** The  $N_2$  adsorption isotherm curve of pure TbPDDI.

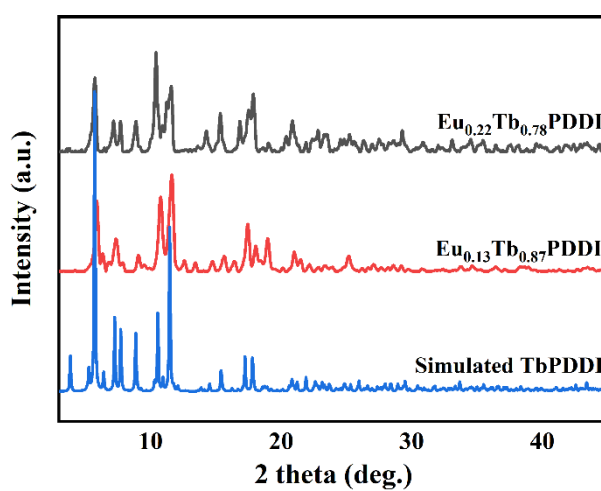

**Fig. S4** The powder XRD patterns of  $Eu_{0.13}Tb_{0.87}PDDI$  and  $Eu_{0.22}Tb_{0.78}PDDI$  compared to simulated crystal data.

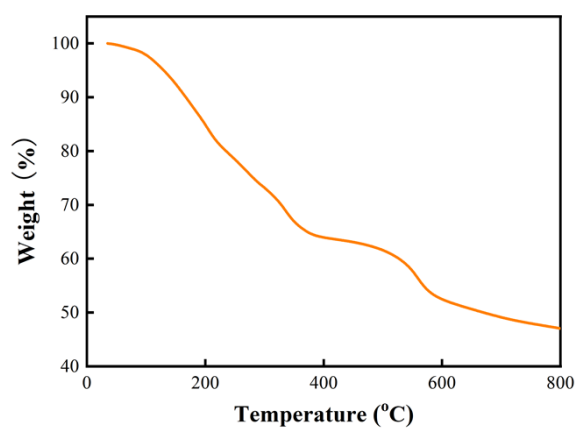

**Fig. S5** The TGA curve of TbPDDI.

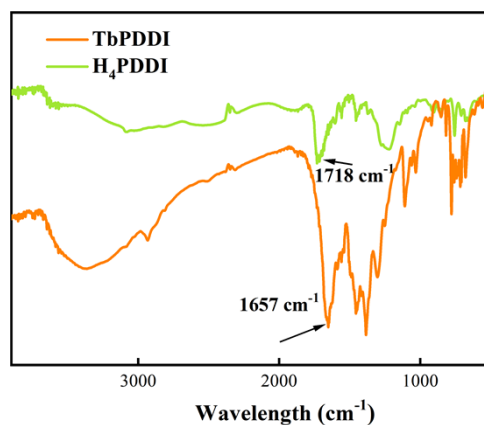

**Fig. S6** The FTIR spectra of H<sub>4</sub>PDDI and TbPDDI.

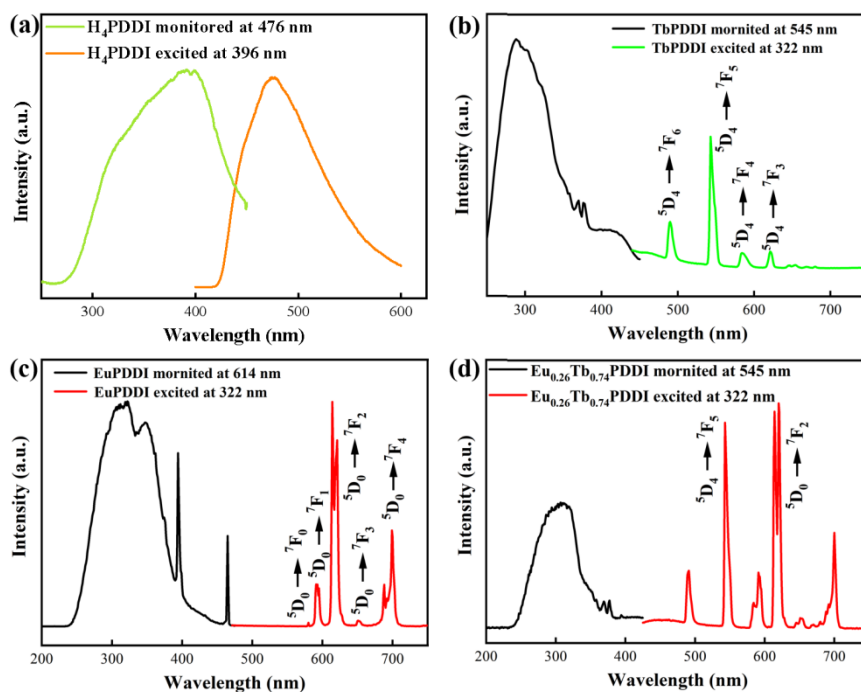

**Fig. S7** The excitation and emission spectra of (a) H<sub>4</sub>PDDI, (b) TbPDDI, (c) EuPDDI and (d) Eu<sub>0.26</sub>Tb<sub>0.74</sub>PDDI.

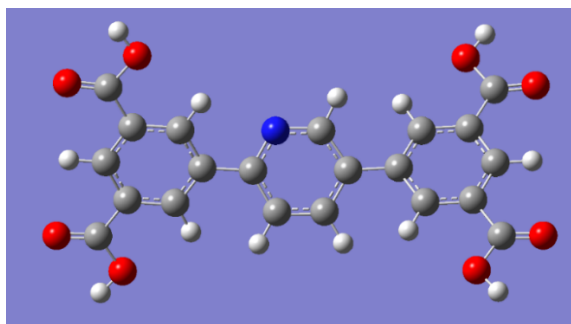

Fig. S8 The optimized geometry of free H<sub>4</sub>PDDI ligand.

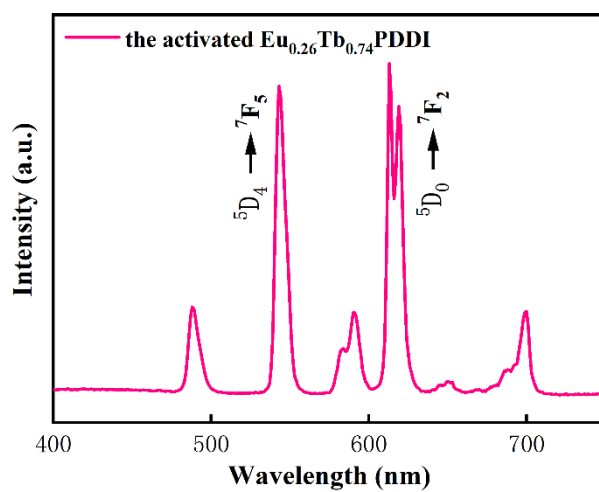

Fig. S9 The emission spectra of activated Eu<sub>0.26</sub>Tb<sub>0.74</sub>PDDI when excited at 322 nm.

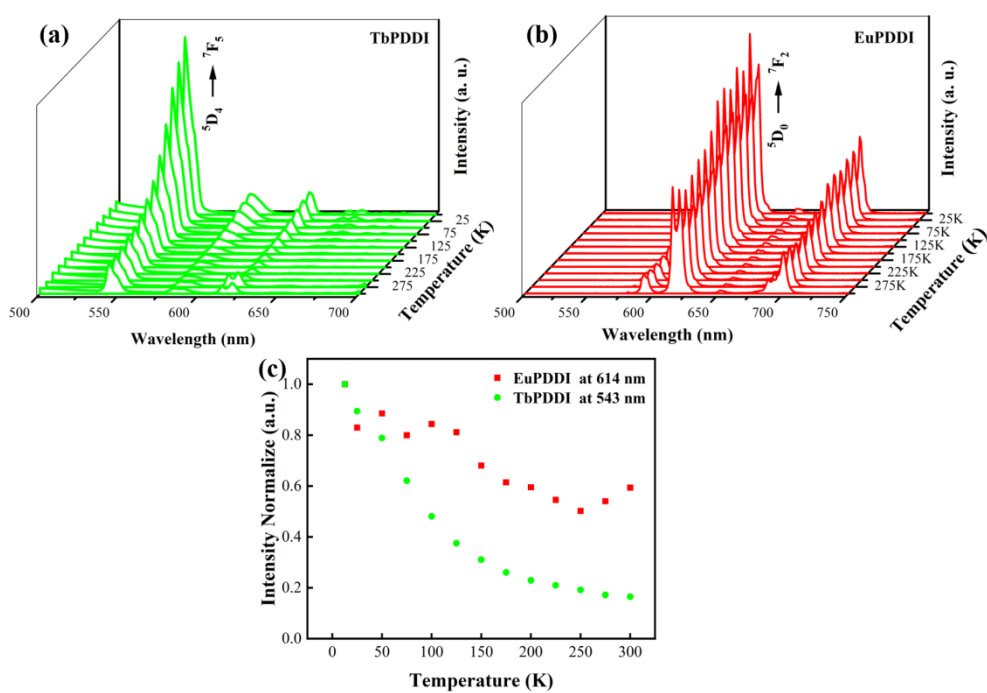

**Fig. S10** Emission spectra of (a) TbPDDI and (b) EuPDDI and recorded in the temperature range of 12 and 300 K, excited at 322 nm. (c) The temperature-dependent intensity of Tb<sup>3+</sup> (543 nm) and Eu<sup>3+</sup> (614 nm).

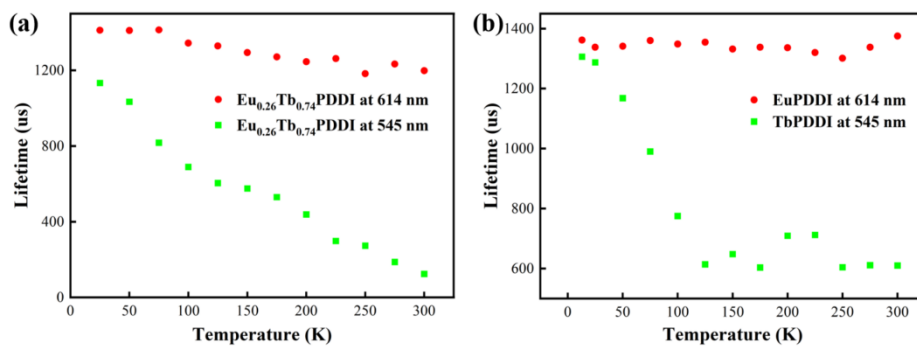

**Fig. S11** The lifetime changes of Tb<sup>3+</sup> (<sup>5</sup>D<sub>4</sub>, 545 nm) and Eu<sup>3+</sup> (<sup>5</sup>D<sub>0</sub>, 614 nm) in (a)  $\text{Eu}_{0.26}\text{Tb}_{0.74}\text{PDDI}$  and (b) two S' LnMOFs.

## Reference

- 1 S. Wang, M. Gong, X. Han, D. Zhao, J. Liu, Y. Lu, C. Li and B. Chen, *ACS Appl. Mater. Interfaces*, 2021, **13**, 11078.
- 2 A. D. Becke, *J. Chem. Phys.*, 1993, **98**, 5648.
- 3 E. Runge and E. K. U. Gross, *Phys. Rev. Lett.*, 1984, **52**, 997.
- 4 M.J. Frisch, G.W. Trucks, H.B. Schlegel, Gaussian 09, revision D.01; Gaussian Inc.: Pittsburgh, PA, 2009.
